# Supplementary material for: The impact of daily caffeine intake on nighttime sleep in young adult men
Source: PubMed Central journal article supplement (PMC7907384; doi:10.1038/s41598-021-84088-x), 2021-02-25
Supplement: 41598_2021_84088_MOESM1_ESM.pdf [file 41598_2021_84088_MOESM1_ESM.pdf]

## Supplemental Material

### The impact of daily caffeine intake on nighttime sleep in young adult men

Janine Weibel<sup>1,2</sup>, Yu-Shiuan Lin<sup>1,2,3</sup>, Hans-Peter Landolt<sup>4,5</sup>, Joshua Kistler<sup>1,2</sup>, Sophia Rehm<sup>6</sup>, Katharina M. Rentsch<sup>6</sup>, Helen Slawik<sup>7</sup>, Stefan Borgwardt<sup>3</sup>, Christian Cajochen<sup>1,2\*</sup>, Carolin F. Reichert<sup>1,2\*</sup>

<sup>1</sup> Centre for Chronobiology, Psychiatric Hospital of the University of Basel, Basel, Switzerland

<sup>2</sup> Transfaculty Research Platform Molecular and Cognitive Neurosciences, University of Basel, Basel, Switzerland

<sup>3</sup> Neuropsychiatry and Brain Imaging, Psychiatric Hospital of the University of Basel, Basel, Switzerland

<sup>4</sup> Institute of Pharmacology and Toxicology, University of Zürich, Zürich, Switzerland

<sup>5</sup> Sleep & Health Zürich, University Center of Competence, University of Zürich, Zürich, Switzerland

<sup>6</sup> Laboratory Medicine, University Hospital Basel, Basel, Switzerland

<sup>7</sup> Clinical Sleep Laboratory, Psychiatric Hospital of the University of Basel, Basel, Switzerland

\*Authors contributed equally to this work

**Table 1.** Sleep-wake times derived from the subjective sleep logs prior the in-lab part of the study.

| Parameter   | Placebo      | Caffeine      | Withdrawal   | Condition Effect              |
|-------------|--------------|---------------|--------------|-------------------------------|
| Bedtime     | 23.15 ± 0.13 | 23.32 ± 0.15* | 23.27 ± 0.14 | $F_{2,37} = 4.59; p = 0.02$   |
| Lightsoff   | 23.24 ± 0.15 | 23.41 ± 0.16* | 23.37 ± 0.14 | $F_{2,37} = 3.99; p = 0.03$   |
| Lightson    | 7.31 ± 0.16  | 7.46 ± 0.19   | 7.45 ± 0.16  | $F_{2,33.1} = 3.12; p = 0.06$ |
| Wake-up     | 7.10 ± 0.15  | 7.24 ± 0.15*  | 7.26 ± 0.15  | $F_{2,36.9} = 3.56; p = 0.04$ |
| Time in bed | 8.09 ± 0.07  | 8.04 ± 0.08   | 8.08 ± 0.06  | $F_{2,35.1} = 0.14; p > 0.8$  |

Represented are means ± standard errors. Mixed model analysis of variance was performed (PROC MIXED) using the statistical software SAS (SAS Institute, Cary, NC, USA; version 9.4). Contrasts were calculated by the LSMEANS statement and degrees of freedom were adjusted based on Kenward and Roger<sup>1</sup>.

\* $p < 0.05$  compared to the placebo condition after correction for multiple comparisons.

**Table 2.** Sleep-wake times estimated from actimetric data.

| Parameter     | Placebo      | Caffeine      | Withdrawal    | Condition Effect              |
|---------------|--------------|---------------|---------------|-------------------------------|
| Sleep start   | 23.40 ± 0.18 | 23.82 ± 0.17* | 23.83 ± 0.15* | $F_{2,26} = 6.09; p < 0.01$   |
| Sleep end     | 7.08 ± 0.20  | 7.44 ± 0.19*  | 7.41 ± 1.16*  | $F_{2,25.6} = 4.39; p = 0.02$ |
| Assumed sleep | 7.60 ± 0.09  | 7.52 ± 0.12   | 7.52 ± 0.13   | $F_{2,31.6} = 0.16; p > 0.8$  |

Represented are means ± standard errors. Mixed model analysis of variance was performed (PROC MIXED) using the statistical software SAS (SAS Institute, Cary, NC, USA; version 9.4). Contrasts were calculated by the LSMEANS statement and degrees of freedom were adjusted based on Kenward and Roger<sup>1</sup>. Thirteen datasets were excluded from the analyses due to technical problems.

\* $p < 0.05$  compared to the placebo condition after correction for multiple comparisons.

## References

- 1 Kenward, M. G. & Roger, J. H. Small sample inference for fixed effects from restricted maximum likelihood. *Biometrics* **53**, 983-997, doi:10.2307/2533558 (1997).
